# Supplementary material
Source: publisher figshare collection journal article supplement (https://rs.figshare.com/ndownloader/files/26634766)
Supplement: Supplementary file 1 [file 26634766]

## Sheet: Sheet1
Species	Island	Body mass (kg)	Binary extinction	Graded extinction	Island occurrence/extinction reference	Area (km2)	Maximum elevation (m)	Mean elevation (m)	Proportion forest cover 2000	Proportion forest loss 2000-2014	Mean HFI	Active volcano	Hurricane frequency 1851-2011	Mongoose	First human arrival (cal BP)
Acratocnus antillensis	Cuba	26.25	0	0	Silva Taboada et al. 2007; Turvey 2009	123293	1973	102.363	0.298644	0.0447676	42.3754	0	45	1	5904
Acratocnus antillensis	Juventud	26.25	0	0	Silva Taboada et al. 2007	2561.11	304	19.5564	0.451502	0.0415818	36.476	0	NA	1	NA
Acratocnus odontrigonus	Puerto Rico	22.99	0	0	Woods 1996; Turvey 2009	9719.53	1328	238.005	0.517907	0.0273384	63.3527	0	45	1	4654
Acratocnus simorhynchus	Hispaniola	16.38	0	0	Turvey 2009	82765.6	3097	406.149	0.374443	0.0736051	38.1338	0	41.25	1	6024
Acratocnus ye	Hispaniola	21.31	0	0	MacPhee et al. 2000; Turvey 2009	82765.6	3097	406.149	0.374443	0.0736051	38.1338	0	41.25	1	6024
Antillomys rayi	Antigua	0.28	0	1	Turvey et al. 2010; Brace et al. 2015	313.589	392	46.7034	0.324748	0.0396585	62.8524	0	41.25	1	5095
Antillomys rayi	Barbuda	0.28	0	1	Turvey et al. 2010; Brace et al. 2015	169.394	50	11.8894	0.43294	0.00549708	19.5957	0	41.25	1	3774
Antillomys rayi	Guadeloupe	0.28	0	0	Turvey et al. 2010; Brace et al. 2015	1592.26	1456	183.645	0.502478	0.0175045	54.6984	1	41.25	1	3639
Antillomys rayi	La Desirade	0.28	0	1	Turvey et al. 2010; Brace et al. 2015	25.0013	282	99.6845	0.421842	0.00375944	NA	0	41.25	1	985
Antillomys rayi	Marie Galante	0.28	0	0	Turvey et al. 2010; Brace et al. 2015	175.185	198	82.6372	0.495692	0.0678705	44.1904	0	41.25	1	4889
Antillothrix bernensis	Hispaniola	4.57	0	0	Turvey 2009	82765.6	3097	406.149	0.374443	0.0736051	38.1338	0	41.25	1	6024
Boromys offella	Cuba	0.32	0	1	Silva Taboada et al. 2007; Turvey 2009	123293	1973	102.363	0.298644	0.0447676	42.3754	0	41.25	1	5904
Boromys offella	Juventud	0.32	0	0	Silva Taboada et al. 2007	2561.11	304	19.5564	0.451502	0.0415818	36.476	0	41.25	1	NA
Boromys offella	Salinas	0.32	0	0	Silva Taboada et al. 2007	10.8031	11	2.61183	0.369244	0.000959187	NA	0	41.25	0	NA
Boromys torrei	Cuba	0.12	0	1	Silva Taboada et al. 2007; Turvey 2009	123293	1973	102.363	0.298644	0.0447676	42.3754	0	41.25	1	5904
Boromys torrei	Juventud	0.12	0	0	Silva Taboada et al. 2007	2561.11	304	19.5564	0.451502	0.0415818	36.476	0	41.25	1	NA
Brotomys contractus	Hispaniola	0.12	0	0	Turvey 2009	82765.6	3097	406.149	0.374443	0.0736051	38.1338	0	41.25	1	6024
Brotomys voratus	Beata	0.4	0	0	Rímoli in Guerrero & Elpidio Ortega 1981	48.6991	87	32.6129	0.646317	8.95e-05	NA	0	41.25	0	NA
Brotomys voratus	Gonave	0.4	0	0	Miller 1930	761.377	776	217.669	0.11157	0.115721	31.2125	0	41.25	1	NA
Brotomys voratus	Hispaniola	0.4	0	1	Turvey 2009	82765.6	3097	406.149	0.374443	0.0736051	38.1338	0	41.25	1	6024
Capromys pilorides	Avalos	3.36	1	4	Silva Taboada et al. 2007	1.83274	16	6.87371	0.0746367	0.0635654	NA	0	41.25	0	NA
Capromys pilorides	Ballenatos	3.36	1	4	Silva Taboada et al. 2007; Borroto-Páez et al. 2012a	0.207521	58	25.0531	0.596449	0.0455721	NA	0	41.25	0	NA
Capromys pilorides	Blanco	3.36	0	2	Silva Taboada et al. 2007; Borroto-Páez & Woods 2012	2.65049	15	4.88267	0.485236	0	NA	0	41.25	0	NA
Capromys pilorides	Campo	3.36	1	3	Silva Taboada et al. 2007; Borroto-Páez & Ramos García 2012	12.1389	28	6.54032	0.0672971	0.0190966	NA	0	41.25	0	NA
Capromys pilorides	Cinco Leguas	3.36	1	4	Silva Taboada et al. 2007	51.0406	14	4.03957	0.20414	0	NA	0	41.25	0	NA
Capromys pilorides	Coco	3.36	1	4	Silva Taboada et al. 2007	399.824	56	5.49046	0.365648	0.0122413	22.294	0	41.25	0	NA
Capromys pilorides	Cruz del Padre	3.36	1	4	Silva Taboada et al. 2007	23.4371	18	5.28484	0.303305	0	NA	0	41.25	0	NA
Capromys pilorides	El Calvario	3.36	1	4	Silva Taboada et al. 2007	1.11954	14	6.26983	0.240465	0	NA	0	41.25	0	NA
Capromys pilorides	Ensenacho	3.36	1	4	Silva Taboada et al. 2007	2.54903	13	5.43503	0.253609	0.0907994	NA	0	41.25	0	NA
Capromys pilorides	Estopa	3.36	1	4	Silva Taboada et al. 2007	3.66909	16	7.15694	0.0891982	0	NA	0	41.25	0	NA
Capromys pilorides	Frances	3.36	1	4	Silva Taboada et al. 2007; Borroto-Páez et al. 2012a	7.61793	25	7.47143	0.525671	0	NA	0	41.25	0	NA
Capromys pilorides	Hicacos	3.36	1	4	Silva Taboada et al. 2007	3.78828	13	6.1009	0.0944828	0	NA	0	41.25	0	NA
Capromys pilorides	Juan Clarito	3.36	1	4	Silva Taboada et al. 2007	3.78981	11	5.59023	0.392385	0	NA	0	41.25	0	NA
Capromys pilorides	Juan Garcia	3.36	0	2	Juan Soy, unpublished survey report	1.83642	16	7.41687	0.300144	0.014077	NA	0	41.25	0	NA
Capromys pilorides	Las Cruces	3.36	1	4	Silva Taboada et al. 2007	10.49	10	0.515799	0.0114675	0	NA	0	41.25	0	NA
Capromys pilorides	Macho	3.36	1	4	Silva Taboada et al. 2007	2.14796	12	4.34122	0.158754	0	NA	0	41.25	0	NA
Capromys pilorides	Matias	3.36	1	4	Silva Taboada et al. 2007	8.7254	17	6.87805	0.19513	0.00187594	NA	0	41.25	0	NA
Capromys pilorides	Mono	3.36	0	2	Borroto-Páez & Woods 2012	0.102437	5	2.33929	0.000400764	0	NA	0	41.25	0	NA
Capromys pilorides	Mono-Galindo	3.36	1	4	Borroto-Páez et al. 2012a	5.56979	16	5.49276	0.495569	0.000565182	NA	0	41.25	0	NA
Capromys pilorides	Peraza	3.36	1	4	Silva Taboada et al. 2007	1.82332	13	6.10662	0.00723652	0	NA	0	41.25	0	NA
Capromys pilorides	Piedra	3.36	1	4	Silva Taboada et al. 2007	2.33982	14	7.78031	0.0982511	0.0470374	NA	0	41.25	0	NA
Capromys pilorides	Real	3.36	0	2	Juan Soy, unpublished survey report	10.095	16	7.53919	0.331086	0.0123787	NA	0	41.25	0	NA
Capromys pilorides	Rico	3.36	1	4	Silva Taboada et al. 2007	2.23249	19	6.44462	0.0356637	0	NA	0	41.25	0	NA
Capromys pilorides	Romano	3.36	1	3	Borroto-Páez & Woods 2012	337.506	43	2.58475	0.0409007	0.000268251	21	0	41.25	1	NA
Capromys pilorides	Romero	3.36	1	4	Silva Taboada et al. 2007	0.239865	7	1.15209	0.134149	0	NA	0	41.25	0	NA
Capromys pilorides	Rosario	3.36	1	4	Silva Taboada et al. 2007	24.7245	19	7.00073	0.0362026	0.00780619	NA	0	41.25	0	NA
Capromys pilorides ("Mysateles garridoi")	Cayeria Los Majaes	3.36	0	2	Borroto-Páez & Ramos García 2012	3.30768	14	5.4718	0.04593	0	NA	0	41.25	0	NA
Capromys pilorides ciprianoi	Juventud	4.25	1	4	Silva Taboada et al. 2007; Borroto-Páez & Ramos García 2012	2561.11	304	19.5564	0.451502	0.0415818	36.476	0	41.25	1	NA
Capromys pilorides doceleguas	Alcatracito	3.15	1	4	Silva Taboada et al. 2007	0.33201	6	3.13973	0.0662768	0.0216418	NA	0	41.25	0	NA
Capromys pilorides doceleguas	Alcatraz	3.15	1	4	Silva Taboada et al. 2007	0.102785	16	6.70492	0.000639056	0	NA	0	41.25	0	NA
Capromys pilorides doceleguas	Algodon Grande	3.15	1	4	Silva Taboada et al. 2007	4.85032	10	0.382679	0.0640473	0.0376107	NA	0	41.25	0	NA
Capromys pilorides doceleguas	Anclitas-Miraflores	3.15	1	4	Silva Taboada et al. 2007	19.3637	14	0.990965	0.0521513	0	NA	0	41.25	0	NA
Capromys pilorides doceleguas	Balandras	3.15	1	4	Silva Taboada et al. 2007	2.05683	7	1.55279	0.249968	0	NA	0	41.25	0	NA
Capromys pilorides doceleguas	Boca Chica	3.15	1	4	Silva Taboada et al. 2007	5.5119	7	0.972898	0.0180929	0	NA	0	41.25	0	NA
Capromys pilorides doceleguas	Breton	3.15	1	4	Silva Taboada et al. 2007	10.7787	10	2.22375	0.00844018	0.144585	NA	0	41.25	0	NA
Capromys pilorides doceleguas	Caballones	3.15	1	4	Silva Taboada et al. 2007	2.4406	14	3.53108	0.28848	0.00226239	NA	0	41.25	0	NA
Capromys pilorides doceleguas	Cabeza Del Este	3.15	1	4	Silva Taboada et al. 2007	8.86189	16	1.2401	0.00984883	0	NA	0	41.25	0	NA
Capromys pilorides doceleguas	Caguama	3.15	1	4	Silva Taboada et al. 2007	6.63073	11	0.910976	0.0177432	0.00635076	NA	0	41.25	0	NA
Capromys pilorides doceleguas	Camposanto	3.15	1	4	Silva Taboada et al. 2007	3.66577	8	0.568176	0.00661866	0	NA	0	41.25	0	NA
Capromys pilorides doceleguas	Cinco Balas	3.15	1	4	Silva Taboada et al. 2007	31.5011	14	2.17234	0.0429129	0.0521016	NA	0	41.25	0	NA
Capromys pilorides doceleguas	Cotorro	3.15	1	4	Silva Taboada et al. 2007	3.22363	12	2.81103	0.0257682	0	NA	0	41.25	0	NA
Capromys pilorides doceleguas	Grande	3.15	1	4	Silva Taboada et al. 2007	8.7106	22	7.47223	0.333904	0.0099397	NA	0	41.25	0	NA
Capromys pilorides doceleguas	Guasa	3.15	1	4	Silva Taboada et al. 2007	0.309847	6	2.8006	0.254709	0	NA	0	41.25	0	NA
Capromys pilorides doceleguas	Jia	3.15	1	4	Silva Taboada et al. 2007	2.29019	13	1.84256	0.0116338	0	NA	0	41.25	0	NA
Capromys pilorides doceleguas	Juan Grin	3.15	1	4	Silva Taboada et al. 2007	1.29442	7	0.577809	0.0178939	0	NA	0	41.25	0	NA
Capromys pilorides doceleguas	La Cafetera	3.15	1	4	Silva Taboada et al. 2007	2.10759	7	1.20181	0.0098329	0	NA	0	41.25	0	NA
Capromys pilorides doceleguas	Largo	3.15	1	4	Silva Taboada et al. 2007	0.839356	11	3.3129	0.525151	0	NA	0	41.25	0	NA
Capromys pilorides doceleguas	Las Varas	3.15	1	4	Silva Taboada et al. 2007	0.174707	15	7.85326	0.375269	0	NA	0	41.25	0	NA
Capromys pilorides doceleguas	Los Chinos	3.15	1	4	Silva Taboada et al. 2007	5.61273	11	0.74562	0.0276701	0	NA	0	41.25	0	NA
Capromys pilorides doceleguas	Maria Velache	3.15	1	4	Silva Taboada et al. 2007	3.6829	15	1.39341	0.0158889	0	NA	0	41.25	0	NA
Capromys pilorides doceleguas	Piedra Chica	3.15	1	4	Silva Taboada et al. 2007	0.378111	3	-0.165049	0	0	NA	0	41.25	0	NA
Capromys pilorides doceleguas	Piedra Grande	3.15	1	4	Silva Taboada et al. 2007	2.15278	8	1.41681	0.037438	0	NA	0	41.25	0	NA
Capromys pilorides doceleguas	Salinas	3.15	1	4	Silva Taboada et al. 2007; Borroto-Páez et al. 2012a, 2012b	10.8031	11	2.61183	0.369244	0.000959187	NA	0	41.25	0	NA
Capromys pilorides gundlachianus	Boca Rompia	2.65	1	4	Silva Taboada et al. 2007	4.27091	14	4.0214	0.127555	0	NA	0	41.25	0	NA
Capromys pilorides gundlachianus	Fragoso	2.65	1	4	Silva Taboada et al. 2007; Borroto-Páez et al. 2012b	99.8521	12	2.03075	0.19123	0.000119109	24.1973	0	41.25	0	NA
Capromys pilorides gundlachianus	Guillermo	2.65	1	4	Silva Taboada et al. 2007; Borroto-Páez et al. 2012b	20.2715	19	3.70338	0.147153	0.00944926	NA	0	41.25	0	NA
Capromys pilorides gundlachianus	Las Brujas	2.65	1	4	Silva Taboada et al. 2007; Borroto-Páez et al. 2012b	20.3848	21	3.86914	0.195885	0.0225732	NA	0	41.25	0	NA
Capromys pilorides gundlachianus	Punta Arenas	2.65	1	4	Silva Taboada et al. 2007	1.23552	8	3.02618	0.389254	0	NA	0	41.25	0	NA
Capromys pilorides gundlachianus	Santa Maria	2.65	1	4	Silva Taboada et al. 2007; Borroto-Páez et al. 2012a, 2012b	28.1771	31	5.45558	0.378263	0.15345	NA	0	41.25	0	NA
Capromys pilorides lewisi	Cayman Brac	1.98	0	1	Morgan et al. 2019	44.372	52	17.9142	0.351641	0.0290164	NA	0	41.25	0	NA
Capromys pilorides lewisi	Grand Cayman	1.98	0	1	Morgan et al. 2019	236.334	31	5.83332	0.357809	0.0190584	45.5826	0	41.25	0	NA
Capromys pilorides lewisi	Little Cayman	1.98	0	0	Morgan et al. 2019	31.2829	17	5.04221	0.413469	0.00133877	NA	0	41.25	0	NA
Capromys pilorides pilorides	Cuba	3.68	1	4	Silva Taboada et al. 2007	123293	1973	102.363	0.298644	0.0447676	42.3754	0	41.25	1	5904
Capromys pilorides pilorides	Saetia	3.68	1	4	Silva Taboada et al. 2007	51.6986	84	22.9293	0.695161	0.00527838	NA	0	41.25	0	NA
Capromys pilorides relictus	Juventud	3.06	1	3	Silva Taboada et al. 2007; Borroto-Páez & Ramos García 2012	2561.11	304	19.5564	0.451502	0.0415818	36.476	0	41.25	1	NA
Capromys pilorides ("ssp. 3")	Diego Perez	3.36	1	4	Borroto-Páez et al. 2012b	12.1453	16	6.46571	0.167385	0.000383686	NA	0	41.25	0	NA
Capromys pilorides ("ssp. 3")	Macio	3.36	1	4	Borroto-Páez & Mancina 2011; Borroto-Páez et al. 2012b	0.0516672	5	2.85185	0.177666	0	NA	0	41.25	0	NA
Capromys pilorides ("ssp. 4")	Diego Perez	3.36	1	4	Borroto-Páez et al. 2012b	12.1453	16	6.46571	0.167385	0.000383686	NA	0	41.25	0	NA
Capromys pilorides ("ssp. 4")	Macio	3.36	1	4	Borroto-Páez & Mancina 2011; Borroto-Páez et al. 2012b	0.0516672	5	2.85185	0.177666	0	NA	0	41.25	0	NA
Capromys pilorides? ("Capromys sp. nov.?")	Sabinal	3.36	1	4	Borroto-Páez et al. 2012a, 2012b	397.046	34	6.52299	0.499478	0.00280419	30.1768	0	41.25	1	NA
Capromys pilorides? ("Capromys sp. nov.")	Ballenatos	3.36	1	4	Turvey et al. 2017	0.207521	58	25.0531	0.596449	0.0455721	NA	0	41.25	0	NA
Clidomys osborni	Jamaica	18.02	0	0	Cooke et al. 2017a	12203.2	2249	321.651	0.625345	0.0477148	45.1848	0	41.25	1	1208
Elasmodontomys obliquus	Puerto Rico	8.45	0	0	Woods 1996; Turvey 2009	9719.53	1328	238.005	0.517907	0.0273384	63.3527	0	41.25	1	4654
Geocapromys brownii	Jamaica	1.5	1	3	Turvey et al. 2017	12203.2	2249	321.651	0.625345	0.0477148	45.1848	0	41.25	1	1208
Geocapromys caymanensis	Cayman Brac	1.22	0	1	Morgan et al. 2019	44.372	52	17.9142	0.351641	0.0290164	NA	0	41.25	0	NA
Geocapromys caymanensis	Grand Cayman	0.98	0	1	Morgan et al. 2019	236.334	31	5.83332	0.357809	0.0190584	45.5826	0	41.25	0	NA
Geocapromys columbianus	Cuba	1.24	0	1	Silva Taboada et al. 2007; Turvey 2009	123293	1973	102.363	0.298644	0.0447676	42.3754	0	41.25	1	5904
Geocapromys columbianus	Juventud	1.24	0	0	Silva Taboada et al. 2007	2561.11	304	19.5564	0.451502	0.0415818	36.476	0	41.25	1	NA
Geocapromys columbianus	Salinas	1.24	0	0	Silva Taboada et al. 2007	10.8031	11	2.61183	0.369244	0.000959187	NA	0	41.25	0	NA
Geocapromys ingrahami	Acklins	0.96	0	0	Jordan 1989	581.248	43	4.35801	0.213175	0.00141487	18.2688	0	41.25	0	NA
Geocapromys ingrahami	Cat Island	0.96	0	0	Morgan 1989	446.044	65	10.5247	0.599944	0.0821108	26.1817	0	41.25	0	NA
Geocapromys ingrahami	Middle Caicos	0.96	0	0	Wing & Wing 1995	152.898	47	7.6212	0.0876948	0.00105448	22.3529	0	41.25	0	854
Geocapromys ingrahami	New Providence	0.96	0	1	Morgan 1989	274.387	41	7.40797	0.142879	0.247532	66.8158	0	41.25	0	NA
Geocapromys ingrahami	North Andros	0.96	0	0	Morgan 1989; Anon. 2009	4439.26	96	5.23238	0.102516	0.0236722	11.9364	0	41.25	0	NA
Geocapromys ingrahami	San Salvador	0.96	0	0	Wing 1969	190.106	42	7.4395	0.21138	0.000734544	29.6402	0	41.25	0	1278
Geocapromys ingrahami	South Andros	0.96	0	0	Morgan 1989; Hutchinson 1999	1215.29	57	4.62179	0.141903	0.0256162	11.6278	0	41.25	0	NA
Geocapromys ingrahami	Samana Cay	0.96	0	2	Turvey et al. 2017	41.6492	29	5.34861	0.133664	0.000704991	NA	0	41.25	0	NA
Geocapromys ingrahami abaconis	Great Abaco	0.83	0	0	Morgan 1989; Steadman et al. 2007, 2014	1447.93	42	5.05526	0.255244	0.0532134	31.6764	0	41.25	0	923
Geocapromys ingrahami ingrahami	East Plana Cay	0.71	1	3	Turvey et al. 2017	9.7578	10	0.13094	0	0	NA	0	41.25	0	NA
Geocapromys ingrahami irrectus	Crooked Island	1.3	0	1	Morgan 1989; Steadman et al. 2017	320.11	45	4.65697	0.3556	0.00263657	17.2385	0	41.25	0	692
Geocapromys ingrahami irrectus	Eleuthera	0.96	0	0	Lawrence 1934; Morgan 1989	550.959	78	10.7842	0.523867	0.0983423	41.989	0	41.25	0	1594
Geocapromys ingrahami irrectus	Great Exuma	1	0	0	Morgan 1989	252.56	35	5.3961	0.258325	0.020144	34.8607	0	41.25	0	NA
Geocapromys ingrahami irrectus	Little Exuma	1	0	0	Lawrence 1934; Morgan 1989	36.1491	30	3.32309	0.191439	0.0138435	NA	0	41.25	0	NA
Geocapromys ingrahami irrectus	Long Island	0.96	0	0	Lawrence 1934; Morgan 1989	610.437	105	6.31243	0.354647	0.0111185	30.0654	0	41.25	0	NA
Geocapromys thoracatus	Little Swan Island	0.89	0	2	Turvey 2009	2.03341	4	0.0128148	0	0	NA	0	41.25	0	NA
Heteropsomys insulans	Puerto Rico	0.93	0	0	Woods 1996; Turvey 2009	9719.53	1328	238.005	0.517907	0.0273384	63.3527	0	41.25	1	4654
Heteropsomys insulans	Vieques	0.93	0	0	Woods 1996	164.625	297	36.1847	0.568369	0.0279079	44.9622	0	41.25	1	3731
Hexolobodon phenax	Gonave	3.16	0	0	Miller 1930	761.377	776	217.669	0.11157	0.115721	31.2125	0	41.25	1	NA
Hexolobodon phenax	Hispaniola	3.16	0	1	Turvey 2009	82765.6	3097	406.149	0.374443	0.0736051	38.1338	0	41.25	1	6024
Hexolobodontinae sp. nov.	Hispaniola	1.9	0	0	Turvey 2009	82765.6	3097	406.149	0.374443	0.0736051	38.1338	0	41.25	1	6024
Hyperplagiodontia araeum	Gonave	4.09	0	0	Hansford et al. 2012	761.377	776	217.669	0.11157	0.115721	31.2125	0	41.25	1	NA
Hyperplagiodontia araeum	Hispaniola	4.09	0	1	Hansford et al. 2012	82765.6	3097	406.149	0.374443	0.0736051	38.1338	0	41.25	1	6024
Insulacebus toussaintiana	Hispaniola	4.8	0	0	Turvey 2009	82765.6	3097	406.149	0.374443	0.0736051	38.1338	0	41.25	1	6024
Isolobodon montanus	Beata	1.52	0	0	Rímoli 1981	48.6991	87	32.6129	0.646317	8.95e-05	NA	0	41.25	0	NA
Isolobodon montanus	Gonave	1.52	0	0	Miller 1930	761.377	776	217.669	0.11157	0.115721	31.2125	0	41.25	1	NA
Isolobodon montanus	Hispaniola	1.52	0	1	Turvey 2009	82765.6	3097	406.149	0.374443	0.0736051	38.1338	0	41.25	1	6024
Isolobodon portoricensis	Beata	0.99	0	0	Rímoli in Guerrero & Elpidio Ortega 1981; Rímoli 1981	48.6991	87	32.6129	0.646317	8.95e-05	NA	0	41.25	0	NA
Isolobodon portoricensis	Gonave	0.99	0	0	Miller 1930	761.377	776	217.669	0.11157	0.115721	31.2125	0	41.25	1	NA
Isolobodon portoricensis	Guana	1.44	0	1	Cooke et al. 2017a	4.13651	228	20.9739	0.18331	0	NA	0	41.25	0	NA
Isolobodon portoricensis	Hispaniola	0.99	0	1	Turvey 2009	82765.6	3097	406.149	0.374443	0.0736051	38.1338	0	41.25	1	6024
Isolobodon portoricensis	Jost Van Dyke	1.44	0	0	Newsom & Wing 2004	11.0244	311	75.5707	0.402416	0.000669972	NA	0	41.25	1	NA
Isolobodon portoricensis	Mona	1.44	0	1	Turvey 2009	64.5247	93	51.5805	0.530474	0.00234743	NA	0	41.25	0	NA
Isolobodon portoricensis	Puerto Rico	1.44	0	1	Turvey 2009	9719.53	1328	238.005	0.517907	0.0273384	63.3527	0	41.25	1	4654
Isolobodon portoricensis	St. Croix	1.44	0	0	Woods 1996	241.433	356	61.8992	0.374199	0.0548639	67.7668	0	41.25	1	1313
Isolobodon portoricensis	St. John	1.44	0	1	Woods 1996	63.2337	390	92.8012	0.555289	0.0060091	NA	0	41.25	1	2445
Isolobodon portoricensis	St. Thomas	1.44	0	0	Woods 1996	90.4421	472	84.5076	0.376812	0.022082	66.7324	0	41.25	1	3923
Isolobodon portoricensis	Tortola	1.44	0	0	Newsom & Wing 2004	64.9836	526	125.469	0.502211	0.0129637	67.6608	0	41.25	1	NA
Isolobodon portoricensis	Tortue	0.99	0	0	Woods et al. 1985	202.291	359	141.756	0.544968	0.125184	33.0324	0	41.25	0	NA
Isolobodon portoricensis	Vieques	1.44	0	0	Woods 1996	164.625	297	36.1847	0.568369	0.0279079	44.9622	0	41.25	1	3731
Isolobodon portoricensis	Water Island	1.44	0	0	Buxton et al. 1938	2.30655	75	5.68643	0.10462	0.00255189	NA	0	41.25	1	NA
Macrocapromys acevedo	Cuba	3.18	0	0	Silva Taboada et al. 2007	123293	1973	102.363	0.298644	0.0447676	42.3754	0	41.25	1	5904
Macrocapromys latus	Cuba	3.66	0	0	Silva Taboada et al. 2007	123293	1973	102.363	0.298644	0.0447676	42.3754	0	41.25	1	5904
Megalocnus rodens	Cuba	101.5	0	0	Silva Taboada et al. 2007; Turvey 2009	123293	1973	102.363	0.298644	0.0447676	42.3754	0	41.25	1	5904
Megalocnus rodens	Juventud	101.5	0	0	Silva Taboada et al. 2007	2561.11	304	19.5564	0.451502	0.0415818	36.476	0	41.25	1	NA
Megalocnus rodens	Lucas	101.5	0	0	Silva Taboada et al. 2007	6.40547	26	2.19831	0.144974	0.00432361	NA	0	41.25	0	NA
Megalocnus rodens	Salinas	101.5	0	0	Silva Taboada et al. 2007	10.8031	11	2.61183	0.369244	0.000959187	NA	0	41.25	0	NA
Megalocnus zile	Hispaniola	89.61	0	0	MacPhee et al. 2000; Turvey 2009	82765.6	3097	406.149	0.374443	0.0736051	38.1338	0	41.25	1	6024
Megalocnus zile	Tortue	89.61	0	0	MacPhee et al. 2000; Turvey 2009	202.291	359	141.756	0.544968	0.125184	33.0324	0	41.25	0	NA
Megalomys audreyae	Barbuda	0.18	0	1	Turvey et al. 2010	169.394	50	11.8894	0.43294	0.00549708	19.5957	0	41.25	1	3774
Megalomys desmarestii	Martinique	0.29	0	2	Turvey et al. 2017	1216.61	1383	180.414	0.56094	0.0329704	63.2184	1	41.25	1	3709
Megalomys georginae	Barbados	0.1	0	2	Turvey et al. 2017	463.234	342	104.497	0.0998663	0.0501187	74.9995	0	41.25	1	4495
Megalomys luciae	St. Lucia	0.16	0	2	Turvey et al. 2017	654.924	914	162.994	0.721855	0.014252	52.5304	1	41.25	1	1370
Mesocapromys angelcabrerai	Salinas	0.48	1	3	Silva Taboada et al. 2007; Borroto-Páez et al. 2012a; Turvey et al. 2017	10.8031	11	2.61183	0.369244	0.000959187	NA	0	41.25	0	NA
Mesocapromys auritus	Fragoso	0.82	1	3	Turvey et al. 2017	99.8521	12	2.03075	0.19123	0.000119109	24.1973	0	41.25	0	NA
Mesocapromys kraglievichi	Cuba	0.61	0	0	Silva Taboada et al. 2007; Turvey 2009	123293	1973	102.363	0.298644	0.0447676	42.3754	0	41.25	1	5904
Mesocapromys nanus	Cuba	0.4	1	3	Turvey et al. 2017	123293	1973	102.363	0.298644	0.0447676	42.3754	0	41.25	1	5904
Mesocapromys nanus	Juventud	0.4	0	0	Silva Taboada et al. 2007	2561.11	304	19.5564	0.451502	0.0415818	36.476	0	41.25	1	NA
Mesocapromys sanfelipensis	Juan Garcia	0.61	1	3	Turvey et al. 2017	1.83642	16	7.41687	0.300144	0.014077	NA	0	41.25	0	NA
Mesocapromys sanfelipensis	Real	0.61	1	3	Turvey et al. 2017	10.095	16	7.53919	0.331086	0.0123787	NA	0	41.25	0	NA
Mysateles melanurus	Cuba	1.22	1	3	Turvey et al. 2017	123293	1973	102.363	0.298644	0.0447676	42.3754	0	41.25	1	5904
Mysateles prehensilis gundlachi	Juventud	1.66	1	3	Silva Taboada et al. 2007; Borroto-Páez & Ramos García 2012	2561.11	304	19.5564	0.451502	0.0415818	36.476	0	41.25	1	NA
Mysateles prehensilis prehensilis	Cuba	1.8	1	4	Turvey et al. 2017	123293	1973	102.363	0.298644	0.0447676	42.3754	0	41.25	1	5904
Neocnus comes	Gonave	13.02	0	0	Miller 1930	761.377	776	217.669	0.11157	0.115721	31.2125	0	41.25	1	NA
Neocnus comes	Hispaniola	13.02	0	0	MacPhee et al. 2000; Turvey 2009	82765.6	3097	406.149	0.374443	0.0736051	38.1338	0	41.25	1	6024
Neocnus dousman	Hispaniola	10.46	0	0	MacPhee et al. 2000; Turvey 2009	82765.6	3097	406.149	0.374443	0.0736051	38.1338	0	41.25	1	6024
Neocnus gliriformis	Cuba	17.33	0	0	Silva Taboada et al. 2007; Turvey 2009	123293	1973	102.363	0.298644	0.0447676	42.3754	0	41.25	1	5904
Neocnus gliriformis	Juventud	17.33	0	0	Silva Taboada et al. 2007	2561.11	304	19.5564	0.451502	0.0415818	36.476	0	41.25	1	NA
Neocnus toupiti	Hispaniola	7.05	0	0	MacPhee et al. 2000; Turvey 2009	82765.6	3097	406.149	0.374443	0.0736051	38.1338	0	41.25	1	6024
Nesophontes edithae	Puerto Rico	0.13	0	1	Turvey 2009	9719.53	1328	238.005	0.517907	0.0273384	63.3527	0	41.25	1	4654
Nesophontes edithae	St. John	0.13	0	1	Turvey 2009	63.2337	390	92.8012	0.555289	0.0060091	NA	0	41.25	1	2445
Nesophontes edithae	St. Thomas	0.13	0	0	Woods 1996	90.4421	472	84.5076	0.376812	0.022082	66.7324	0	41.25	1	3923
Nesophontes edithae	Vieques	0.13	0	0	Woods 1996	164.625	297	36.1847	0.568369	0.0279079	44.9622	0	41.25	1	3731
Nesophontes hemicingulus	Cayman Brac	0.03	0	1	Morgan et al. 2019	44.372	52	17.9142	0.351641	0.0290164	NA	0	41.25	0	NA
Nesophontes hemicingulus	Grand Cayman	0.04	0	1	Morgan et al. 2019	236.334	31	5.83332	0.357809	0.0190584	45.5826	0	41.25	0	NA
Nesophontes hypomicrus	Gonave	0.02	0	0	Miller 1930	761.377	776	217.669	0.11157	0.115721	31.2125	0	41.25	1	NA
Nesophontes hypomicrus	Hispaniola	0.02	0	1	Turvey et al. 2017	82765.6	3097	406.149	0.374443	0.0736051	38.1338	0	41.25	1	6024
Nesophontes micrus	Cuba	0.04	0	1	Turvey et al. 2017	123293	1973	102.363	0.298644	0.0447676	42.3754	0	41.25	1	5904
Nesophontes micrus	Guillermo	0.04	0	0	Silva Taboada et al. 2007	20.2715	19	3.70338	0.147153	0.00944926	NA	0	41.25	0	NA
Nesophontes micrus	Juventud	0.04	0	0	Silva Taboada et al. 2007	2561.11	304	19.5564	0.451502	0.0415818	36.476	0	41.25	1	NA
Nesophontes paramicrus	Hispaniola	0.04	0	1	Turvey 2009	82765.6	3097	406.149	0.374443	0.0736051	38.1338	0	41.25	1	6024
Nesophontes zamicrus	Gonave	0.01	0	0	University of Florida collections (unpublished data)	761.377	776	217.669	0.11157	0.115721	31.2125	0	41.25	1	NA
Nesophontes zamicrus	Hispaniola	0.01	0	1	Turvey 2009	82765.6	3097	406.149	0.374443	0.0736051	38.1338	0	41.25	1	6024
Oligoryzomys victus	St. Vincent	0.02	0	2	Turvey 2009	369.543	1213	318.169	0.644991	0.0118273	45.8799	1	41.25	1	1451
Oryzomyini undescribed species (Anguilla taxon)	Anguilla	0.1	0	1	Turvey et al. 2010	84.2175	72	17.5667	0.153098	0.0189144	59.9117	0	41.25	1	3501
Oryzomyini undescribed species (large Grenada taxon)	Grenada	0.21	0	0	Turvey et al. 2010	333.367	831	205.784	0.708583	0.0557564	43.5642	1	41.25	1	1460
Oryzomyini undescribed species (large Montserrat taxon)	Montserrat	0.31	0	0	Turvey et al. 2010	111.713	903	226.169	0.372065	0.0470914	41.1004	1	41.25	0	2074
Oryzomyini undescribed species (Saba taxon)	Saba	0.11	0	1	Turvey et al. 2010	13.7422	888	227.793	0.346147	0.0617763	NA	1	41.25	0	3303
Oryzomyini undescribed species (small Grenada taxon)	Grenada	0.06	0	0	Turvey et al. 2010	333.367	831	205.784	0.708583	0.0557564	43.5642	1	41.25	1	1460
Oryzomyini undescribed species (small Montserrat taxon)	Montserrat	0.12	0	0	Turvey et al. 2010	111.713	903	226.169	0.372065	0.0470914	41.1004	1	41.25	0	2074
Oryzomyini undescribed species (St. Martin taxon)	St. Martin	0.1	0	0	Turvey et al. 2010	105.103	420	57.299	0.24768	0.0213739	NA	0	41.25	1	5131
Oryzomyini undescribed species (St. Martin taxon)	Tintamarre	0.1	0	0	Turvey 2009	1.14609	31	0.924706	5.73e-05	0	NA	0	41.25	0	NA
Oryzomys antillarum	Jamaica	0.06	0	2	Turvey 2009; Cooke et al. 2017a	12203.2	2249	321.651	0.625345	0.0477148	45.1848	0	41.25	1	1208
Paralouatta varonai	Cuba	8.28	0	0	Silva Taboada et al. 2007; Turvey 2009	123293	1973	102.363	0.298644	0.0447676	42.3754	0	41.25	1	5904
Parocnus browni	Cuba	69.2	0	0	Silva Taboada et al. 2007; Turvey 2009	123293	1973	102.363	0.298644	0.0447676	42.3754	0	41.25	1	5904
Parocnus browni	Juventud	69.2	0	0	Silva Taboada et al. 2007	2561.11	304	19.5564	0.451502	0.0415818	36.476	0	41.25	1	NA
Parocnus browni	Lucas	69.2	0	0	Silva Taboada et al. 2007	6.40547	26	2.19831	0.144974	0.00432361	NA	0	41.25	0	NA
Parocnus browni	Salinas	69.2	0	0	Silva Taboada et al. 2007	10.8031	11	2.61183	0.369244	0.000959187	NA	0	41.25	0	NA
Parocnus serus	Gonave	53.07	0	0	MacPhee et al. 2000	761.377	776	217.669	0.11157	0.115721	31.2125	0	41.25	1	NA
Parocnus serus	Hispaniola	53.07	0	0	MacPhee et al. 2000; Turvey 2009	82765.6	3097	406.149	0.374443	0.0736051	38.1338	0	41.25	1	6024
Parocnus serus	Tortue	53.07	0	0	MacPhee et al. 2000	202.291	359	141.756	0.544968	0.125184	33.0324	0	41.25	0	NA
Pennatomys nivalis	Nevis	0.11	0	1	Turvey et al. 2010	105.515	968	154.864	0.46664	0.0317038	NA	1	41.25	1	2153
Pennatomys nivalis	St. Eustatius	0.11	0	0	Turvey et al. 2010	24.6711	588	83.3555	0.278739	0.00430425	NA	1	41.25	0	2452
Pennatomys nivalis	St. Kitts	0.11	0	1	Turvey et al. 2010	196.745	1133	198.025	0.387797	0.0157338	64.7768	1	41.25	1	4151
Plagiodontia aedium	Gonave	1.34	0	0	University of Florida collections (unpublished data)	761.377	776	217.669	0.11157	0.115721	31.2125	0	41.25	1	NA
Plagiodontia aedium	Hispaniola	1.34	1	4	Turvey et al. 2017	82765.6	3097	406.149	0.374443	0.0736051	38.1338	0	41.25	1	6024
Plagiodontia spelaeum	Hispaniola	1.57	0	1	Hansford et al. 2012	82765.6	3097	406.149	0.374443	0.0736051	38.1338	0	41.25	1	6024
Plagiodontia velozi	Hispaniola	5.62	0	1	Hansford et al. 2012	82765.6	3097	406.149	0.374443	0.0736051	38.1338	0	41.25	1	6024
Quemisia gravis	Hispaniola	4.17	0	1	Turvey 2009	82765.6	3097	406.149	0.374443	0.0736051	38.1338	0	41.25	1	6024
Rhizoplagiodontia lemkei	Hispaniola	1.7	0	1	Turvey 2009	82765.6	3097	406.149	0.374443	0.0736051	38.1338	0	41.25	1	6024
Sheep Pen femur (unidentified rodent taxon)	Jamaica	97.01	0	0	Turvey 2009	12203.2	2249	321.651	0.625345	0.0477148	45.1848	0	41.25	1	1208
Solenodon arredondoi	Cuba	0.99	0	0	Silva Taboada et al. 2007; Turvey 2009	123293	1973	102.363	0.298644	0.0447676	42.3754	0	41.25	1	5904
Solenodon cubanus	Cuba	0.23	1	3	Turvey et al. 2017	123293	1973	102.363	0.298644	0.0447676	42.3754	0	41.25	1	5904
Solenodon marcanoi	Hispaniola	0.85	0	1	Turvey 2009	82765.6	3097	406.149	0.374443	0.0736051	38.1338	0	41.25	1	6024
Solenodon paradoxus	Gonave	0.81	0	0	University of Florida collections (unpublished data)	761.377	776	217.669	0.11157	0.115721	31.2125	0	41.25	1	NA
Solenodon paradoxus	Hispaniola	0.81	1	4	Turvey et al. 2017	82765.6	3097	406.149	0.374443	0.0736051	38.1338	0	41.25	1	6024
Tainotherium valei	Puerto Rico	4.44	0	0	Turvey 2009	9719.53	1328	238.005	0.517907	0.0273384	63.3527	0	41.25	1	4654
Xaymaca fulvopulvis	Jamaica	0.16	0	0	Turvey 2009; Cooke et al. 2017a	12203.2	2249	321.651	0.625345	0.0477148	45.1848	0	41.25	1	1208
Xenothrix mcgregori	Jamaica	5.68	0	1	Turvey 2009; Cooke et al. 2017b	12203.2	2249	321.651	0.625345	0.0477148	45.1848	0	41.25	1	1208
Zygodontomys sp.	Carriacou	0.06	0	1	Fitzpatrick et al. 2009; Giovas et al. 2012; Brace et al. 2015	40.7762	291	54.7943	0.424845	0.0428141	NA	0	41.25	1	1472
References:
Anon. 2009. National Geographic expedition to the Blue Holes of the Bahamas. Andros Conservancy and Trust, Bahamas: ANCAT Newsletter 3, 1.
Borroto-Páez R, Mancina CA. 2011. Mamíferos en Cuba. Vaasa, Finland: UPC Print.
Borroto Páez R, Ramos García I. 2012 Status of hutias (Rodentia: Capromyidae) in Los Canarreos Archipelago, Cuba. In Terrestrial Mammals of the West Indies: Contributions (eds Borroto-Páez R, Woods CA, Sergile FE), pp. 221-228. Gainesville, FL: Florida Museum of Natural History / Wacahoota Press.
Borroto Páez R, Woods CA. 2012 Status and impact of introduced mammals of the West Indies. In Terrestrial Mammals of the West Indies: Contributions (eds Borroto-Páez R, Woods CA, Sergile FE), pp. 241-257. Gainesville, FL: Florida Museum of Natural History / Wacahoota Press.
Borroto Páez R, González Rossell A, Fernández de Arcila Fernández R, Estrada Estrada R, Echenique Díaz LM, Perera Puga A. 2012a. Conservation of terrestrial mammals in Cuba. In Terrestrial Mammals of the West Indies: Contributions (eds Borroto-Páez R, Woods CA, Sergile FE), pp. 229-239. Gainesville, FL: Florida Museum of Natural History / Wacahoota Press.
Borroto-Páez R, Mancina CA, Woods CA, Kilpatrick CW. 2012b. Updated checklist of endemic terrestrial mammals of the West Indies. In Terrestrial Mammals of the West Indies: Contributions (eds Borroto-Páez R, Woods CA, Sergile FE), pp. 389-415. Gainesville, FL: Florida Museum of Natural History / Wacahoota Press.
Brace S, Turvey ST, Weksler M, Hoogland MLP, Barnes I. 2015. Unexpected evolutionary diversity in a recently extinct Caribbean mammal radiation. Proceedings of the Royal Society B 282, 20142371.
Buxton LHD, Trevor JC, Julien AH. 1938. Skeletal remains from the Virgin Islands. Man 38, 49-52.
Cooke SB, Dávalos LM, Mychajliw AM, Turvey ST, Upham NS. 2017a. Anthropogenic extinction dominates Holocene declines of West Indian mammals. Annual Review of Ecology, Evolution, and Systematics 48, 301-327.
Cooke SB, Mychajliw AM, Southon J, MacPhee RDE. 2017b. The extinction of Xenothrix mcgregori, Jamaica's last monkey. Journal of Mammalogy 98, 937-949.
Fitzpatrick SM, Kappers M, Kaye Q, Giovas CM, LeFebvre MJ, Harris MH, Burnett S, Pavia JA, Marsaglia K, Feathers J. 2009. Precolumbian settlements on Carriacou, West Indies. Journal of Field Archaeology 34, 247–266.
Giovas CM, LeFebvre MJ, Fitzpatrick SM. 2012. New records for prehistoric introduction of Neotropical mammals to the West Indies: evidence from Carriacou, Lesser Antilles. Journal of Biogeography 39, 476–487.
Hansford J, Nuñez-Miño JM, Young RP, Brace S, Brocca JL, Turvey ST. 2012. Taxonomy-testing and the ‘Goldilocks Hypothesis’: morphometric analysis of species diversity in living and extinct Hispaniolan hutias. Systematics and Biodiversity 10, 491-507.
Hutchinson JMC. 1999. Factors influencing the surface fauna of inland blue holes on South Andros, Bahamas. Bahamas Journal of Science 6, 29-43.
Jordan KC. 1989. An Ecology of the Bahamian hutia. PhD thesis, University of Florida.
Lawrence B. 1934. New Geocapromys from the Bahamas. Occasional Papers of the Boston Society of Natural History 8, 189-196.
MacPhee RDE, White JL, Woods CA. 2000. New megalonychid sloths (Phyllophaga, Xenarthra) from the Quaternary of Hispaniola. American Museum Novitates 3303, 1-32.
Miller GS. 1930. Three small collections of mammals from Hispaniola. Smithsonian Miscellaneous Collections 82(15), 1-9.
Morgan GS. 1989. Fossil Chiroptera and Rodentia from the Bahamas, and the historical biogeography of the Bahamian mammal fauna. In Biogeography of the West Indies: Past, Present, and Future (ed. Woods CA), pp. 685-740. Gainesville, FL: Sandhill Crane Press.
Morgan GS, MacPhee RDE, Woods R, Turvey ST. 2019. Late Quaternary fossil mammals from the Cayman Islands, West Indies. Bulletin of the American Museum of Natural History 428, 1-79.
Newsom LA, Wing ES. 2004. On Land and Sea: Native American Uses of Biological Resources in the West Indies. Tuscaloosa & London: University of Alabama Press.
Rímoli R. 1981. Notas sobre mamíferos fósiles de la Isla Beata. In Investigaciones en las Islas Beata y Alto Velo, pp. 105-109. Santo Domingo, Dominican Republic: Museo del Hombre Dominicano y Marina de Guerra.
Rímoli R in Guerrero J, Elpidio Ortega I. 1981. Informe arqueológico de las Islas Beata y Alto Velo. In Investigaciones en las Islas Beata y Alto Velo, pp. 17-80. Santo Domingo, Dominican Republic: Museo del Hombre Dominicano y Marina de Guerra.
Silva Taboada GW, Suárez Duque W, Diaz Franco S. 2007. Compendio de los Mamíferos Terrestres Autóctonos de Cuba Vivientes y Extinguidos. La Habana, Cuba: Museo Nacional de Historia Natural.
Steadman DW, Franz R, Morgan GS, Albury NA, Kakuk B, Broad K, Franz SE, Tinker K, Pateman MP, Lott TA, Jarzen DM, Dilcher DL. 2007. Exceptionally well preserved late Quaternary plant and vertebrate fossils from a blue hole on Abaco, The Bahamas. Proceedings of the National Academy of Sciences of the USA 104, 19897-19902.
Steadman DW, Albury NA, Maillis P, Mead JI, Slapcinsky J, Krysko KL, Singleton HM, Franklin J. 2014. Late-Holocene faunal and landscape change in the Bahamas. Holocene 24, 220-230.
Steadman DW, Singleton HM, Delancy KM, Albury NA, Soto-Centano JA, Gough H, Duncan N, Franklin J, Keegan WF. 2017. Late Holocene historical ecology: the timing of vertebrate extirpation on Crooked Island, Commonwealth of the Bahamas. Journal of Island and Coastal Archaeology 12, 572-584.
Turvey ST. 2009. Holocene mammal extinctions. In Holocene Extinctions (ed. Turvey ST), pp. 41-61. Oxford: Oxford University Press.
Turvey ST, Weksler M, Morris EL, Nokkert M. 2010. Taxonomy, phylogeny and diversity of the extinct Lesser Antillean rice rats (Sigmodontinae: Oryzomyini), with description of a new genus and species. Zoological Journal of the Linnean Society 160, 748-772.
Turvey ST, Kennerley RJ, Nuñez-Miño JM, Young RP. 2017. The Last Survivors: current status and conservation of the non-volant land mammals of the insular Caribbean. Journal of Mammalogy 98, 918-936.
Wing ES. 1969. Vertebrate remains excavated from San Salvador Island, Bahamas. Caribbean Journal of Science 9, 25-29.
Wing ES, Wing SR. 1995. Prehistoric Ceramic Age adaptation to varying diversity of animal resources along the West Indian archipelago. Journal of Ethnobiology 15, 119-148.
Woods CA. 1996. The land mammals of Puerto Rico and the Virgin Islands. Annals of the New York Academy of Sciences 776, 131-149.
Woods CA, Ottenwalder JA, Oliver WLR. 1985. Lost mammals of the Greater Antilles: the summarised findings of a ten weeks field survey in the Dominican Republic, Haiti and Puerto Rico. Dodo 22, 23-42.
